# Supplementary material for: Effects of infant feeding with goat milk formula or cow milk formula on atopic dermatitis: protocol of the randomised controlled Goat Infant Formula Feeding and Eczema (GIraFFE) trial
Source: PubMed Central journal article supplement — BMJ Open. 2023 Apr 13;13(4):e070533. doi: 10.1136/bmjopen-2022-070533 (PMC10106058; doi:10.1136/bmjopen-2022-070533), 2023-04-13
Supplement: bmjopen-2022-070533supp001.pdf [file bmjopen-2022-070533supp001.pdf]

## Supplemental Material

Supplementary Table 1: Composition of the study infant and follow-on formulas:

| Nutrients                  | Unit            | Whole goat infant formula per 100 mL of prepared feed* | Cow infant formula per 100 mL of prepared feed* | Whole goat follow-on formula per 100 mL of prepared feed* | Cow follow-on formula per 100 mL of prepared feed* |
|----------------------------|-----------------|--------------------------------------------------------|-------------------------------------------------|-----------------------------------------------------------|----------------------------------------------------|
| Energy                     | kj              | 270                                                    | 270                                             | 270                                                       | 270                                                |
|                            | kcal            | 65                                                     | 65                                              | 65                                                        | 65                                                 |
| Fat                        | g               | 3.4                                                    | 3.4                                             | 3.4                                                       | 3.4                                                |
| Milk fat                   | % total fat     | 46                                                     | 2                                               | 46                                                        | 2                                                  |
| Saturated fatty acids      | g               | 1.3                                                    | 1.3                                             | 1.3                                                       | 1.3                                                |
| Docosahexaenoic acid (DHA) | mg              | 15.5                                                   | 15.5                                            | 15.5                                                      | 15.5                                               |
| Arachidonic acid (ARA)     | mg              | 16.1                                                   | 16.1                                            | 16.1                                                      | 16.1                                               |
| Carbohydrate               | g               | 7.3                                                    | 7.3                                             | 7.3                                                       | 7.3                                                |
| Sugars (lactose)           | g               | 7.1                                                    | 7.1                                             | 7.1                                                       | 7.1                                                |
| Protein                    | g               | 1.3                                                    | 1.3                                             | 1.3                                                       | 1.3                                                |
| Whey                       | % total protein | 20                                                     | 60                                              | 20                                                        | 60                                                 |
| Casein                     | % total protein | 80                                                     | 40                                              | 80                                                        | 40                                                 |

\* Prepared as follows: 4.3 g of powder + 30 mL of water (12.9 g of powder per 100 mL of milk).

<sup>1</sup>Retinol equivalents, <sup>2</sup>alpha-tocopherol equivalents, <sup>3</sup>dietary folate equivalents
